# Supplementary material for: Construction Strategy and Mechanism of a Novel Wood Preservative with Excellent Antifungal Effects
Source: MDPI journal article supplement (doi:10.3390/molecules29051013), 2024-02-26
Supplement: s1 [file s1]

# Supporting Information

## **Construction Strategy and Mechanism of a Novel Wood Preservative with Excellent Antifungal Effects**

Lei Wang <sup>a, b, c</sup>, Teng Wang <sup>a, c</sup>, Ruidi Hao <sup>a</sup>, Yamei Wang <sup>a, b, \*</sup>

<sup>a</sup> College of Materials Science and Art Design, Inner Mongolia Agricultural University,  
Hohhot, China;

<sup>b</sup> Inner Mongolia Key Laboratory of Sandy Shrubs Fibrosis and Energy Development and  
Utilization, Hohhot 010018, P. R. China;

<sup>c</sup> These two authors contributed to this work equally.

\*Correspondence: wangym80@126.com (Yamei Wang)

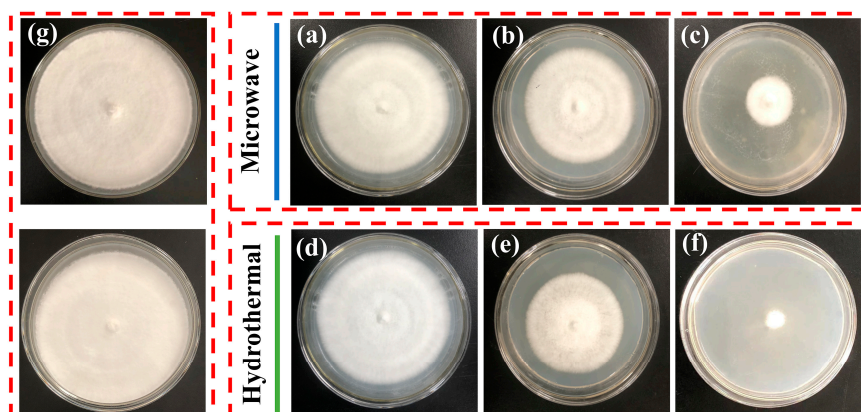

- a. Microwave -modified HACC (0.02g HACC + 0.04 g  $\text{CH}_4\text{N}_2\text{O}$  +10 mL Ultra-pure water)
- b. Microwave -modified HACC (0.02g HACC + 0.04 g  $\text{C}_2\text{H}_7\text{NO}$  +10 mL Ultra-pure water)
- c. Microwave -modified HACC (0.02g HACC + 0.04 g  $\text{CH}_4\text{N}_2\text{O}$  + 0.04 g  $\text{C}_2\text{H}_7\text{NO}$  +10 mL Ultra-pure water)
- d. Hydrothermal-modified HACC (0.02g HACC + 0.04 g  $\text{CH}_4\text{N}_2\text{O}$  +10 mL Ultra-pure water)
- e. Hydrothermal-modified HACC (0.02g HACC + 0.04 g  $\text{C}_2\text{H}_7\text{NO}$  +10 mL Ultra-pure water)
- f. Hydrothermal-modified HACC (0.02g HACC + 0.04 g  $\text{CH}_4\text{N}_2\text{O}$  + 0.04 g  $\text{C}_2\text{H}_7\text{NO}$  +10 mL Ultra-pure water)
- g. Blank group (10 mL Ultra-pure water)

**Figure S1. Antifungal results of 6 different N-CQDs against *C. versicolor*.**

**Tables S1. Single-factor experimental design table.**

| Serial<br>number | Element                            |                  |         |
|------------------|------------------------------------|------------------|---------|
|                  | m(HACC):m(urea):m(ethanolamine)(g) | Temperature (°C) | Time(h) |
| 1                | 1: 0.5: 3.5                        | 120              | 2       |
| 2                | 1: 1: 3                            | 140              | 4       |
| 3                | 1: 2: 2                            | 180              | 8       |
| 4                | 1: 3: 1                            | 220              | 12      |

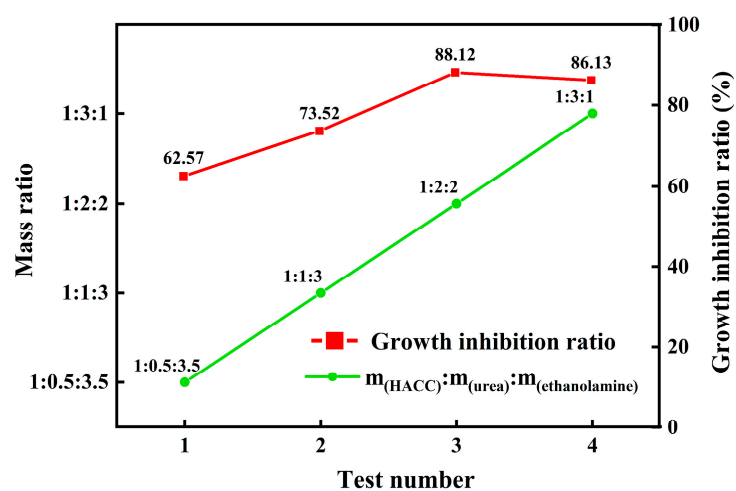

**Figure S2. Different ratio of raw materials for antifungal properties of N-CQDs.**

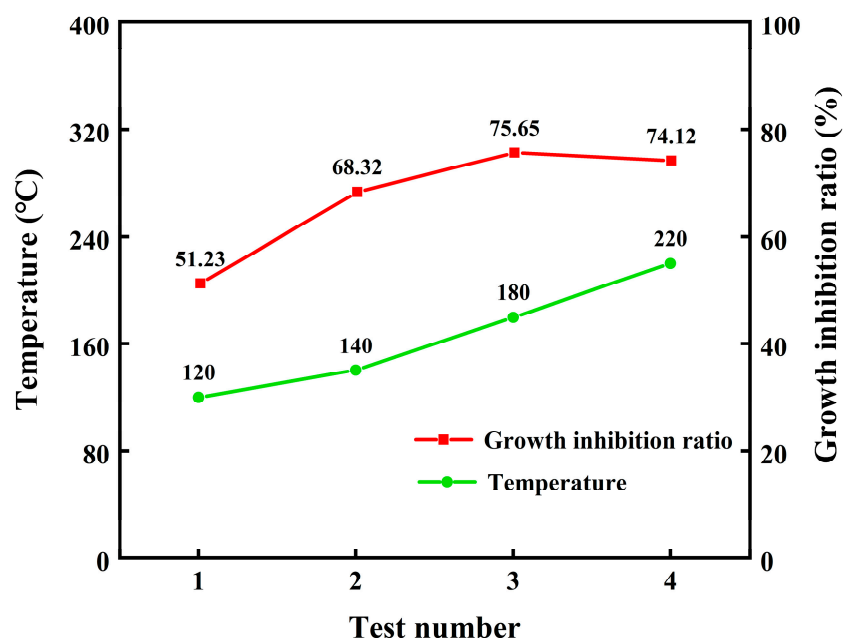

**Figure S3.** Effect of hydrothermal temperature on antifungal activity of N-CQDs.

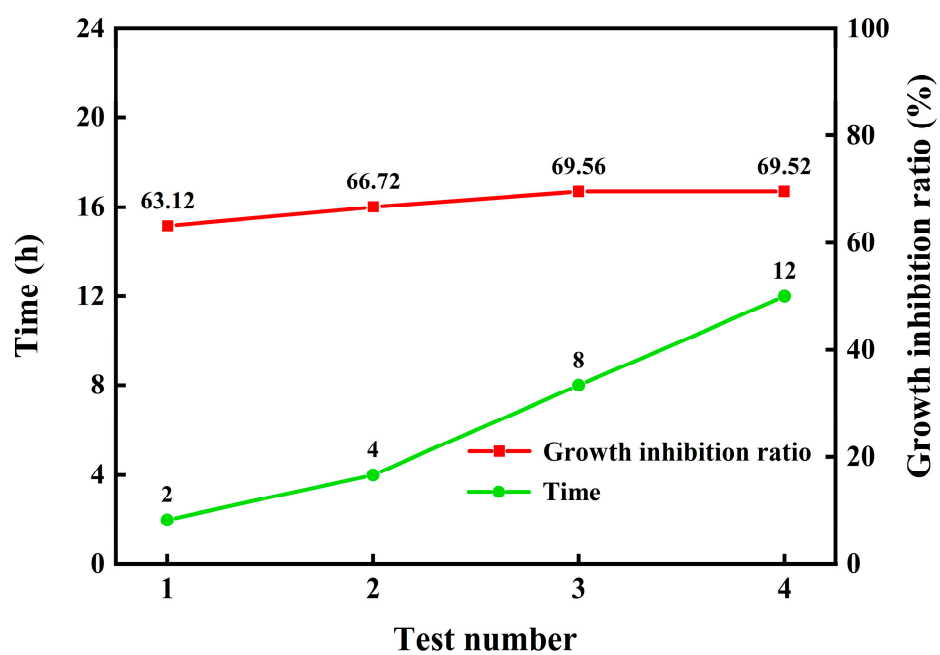

**Figure S4. Effect of hydrothermal time on antifungal activity of N-CQDs.**

**Tables S2. Orthogonal test factors - horizontal design table.**

| Level | Element                            |                  |         |
|-------|------------------------------------|------------------|---------|
|       | m(HACC):m(urea):m(ethanolamine)(g) | Temperature (°C) | Time(h) |
| 1     | 1:1.5:2.5                          | 160              | 6       |
| 2     | 1:2:2                              | 180              | 8       |
| 3     | 1:2.5:1.5                          | 200              | 10      |

**Tables S3. Orthogonal test data table.**

| Test number | Element / Level |       |      | Growth inhibition ratio (%) |
|-------------|-----------------|-------|------|-----------------------------|
|             | A(g)            | B(°C) | C(h) |                             |
| 1           | 1               | 1     | 1    | 81.58                       |
| 2           | 1               | 2     | 2    | 83.29                       |
| 3           | 1               | 3     | 3    | 80.23                       |
| 4           | 2               | 1     | 2    | 89.31                       |
| 5           | 2               | 2     | 3    | 91.74                       |
| 6           | 2               | 3     | 1    | 90.35                       |
| 7           | 3               | 1     | 3    | 93.63                       |
| 8           | 3               | 2     | 1    | 94.41                       |
| 9           | 3               | 3     | 2    | 93.81                       |

**Tables S4. Analysis of variance.**

| Element | Deviation sum of squares | Degree of freedom | F ratio | Significance |
|---------|--------------------------|-------------------|---------|--------------|
| A(g)    | 237.791                  | 2                 | 2.932   | *            |
| B(°C)   | 5.423                    | 2                 | 0.067   |              |
| C(h)    | 0.105                    | 2                 | 0.001   |              |
| Error   | 243.32                   | 6                 |         |              |

**Tables S5. Range analysis table.**

| Test number                   | A      | B      | C      |
|-------------------------------|--------|--------|--------|
| K1                            | 81.730 | 88.173 | 88.780 |
| K2                            | 90.467 | 89.813 | 88.803 |
| K3                            | 93.950 | 88.160 | 88.563 |
| Range R                       | 12.220 | 1.653  | 0.240  |
| Primary and secondary factors |        | A>B>C  |        |

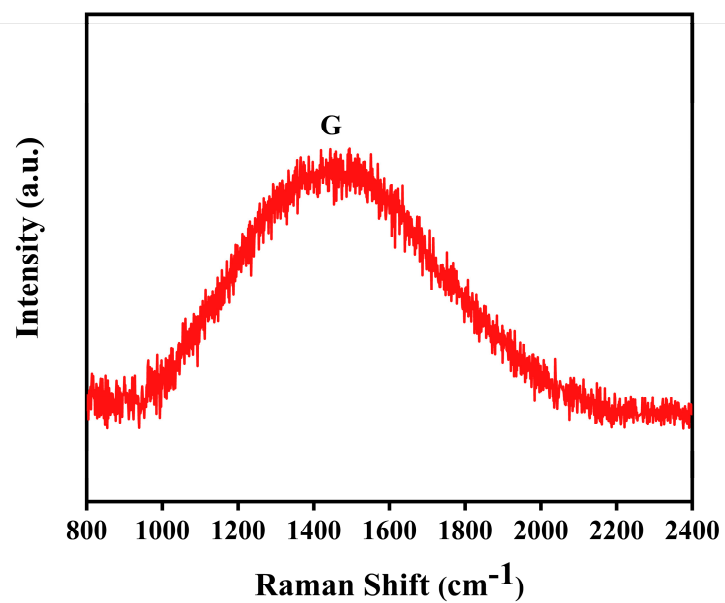

**Figure S5. Raman images of N-CQDs.**

**Tables S6. Evaluation standard for decay resistance of wood.**

| Rank class | Decay resistance         | Mass loss rate/% |
|------------|--------------------------|------------------|
| I          | High decay resistance    | 0-10             |
| II         | Decay resistance         | 11-24            |
| III        | Slight decay resistance, | 25-44            |
| IV         | No decay resistance      | >45              |

**Table. S7. Decay resistance of wood treated with different concentrations of HACC and N-CQDs.**

| Preservative | Concentration (mg/mL) | Ret (kg/m <sup>3</sup> ) | Decay resistance grade |
|--------------|-----------------------|--------------------------|------------------------|
| HACC         | 40                    | 21.39                    | III                    |
|              | 50                    | 26.35                    | II                     |
|              | 60                    | 30.68                    | II                     |
|              | 70                    | 35.31                    | II                     |
|              | 80                    | 39.46                    | I                      |
| N-CQDs       | 2                     | 1.25                     | II                     |
|              | 2.5                   | 1.53                     | II                     |
|              | 3                     | 1.93                     | I                      |
|              | 3.5                   | 2.35                     | I                      |
|              | 4                     | 2.47                     | I                      |
| Blank        | —                     | —                        | IV                     |
